# Supplementary material
Source: PubMed Central journal article supplement (PMC2804847)
Supplement: NIHMS130733-supplement-1.pdf [file NIHMS130733-supplement-1.pdf]

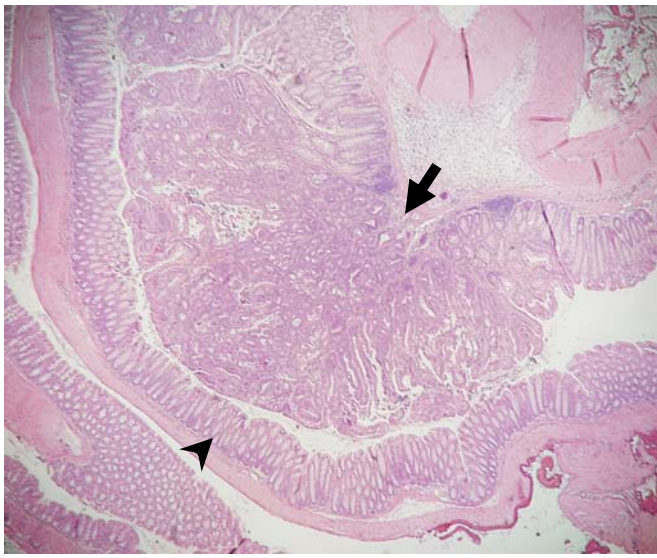

Nod1<sup>+/+</sup>

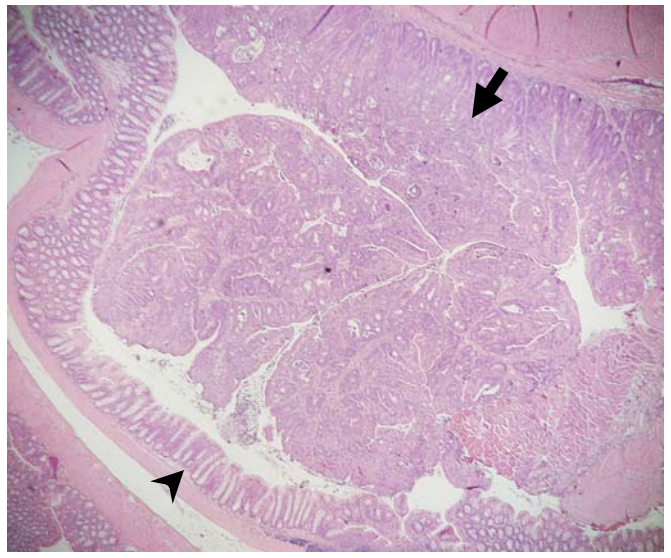

Nod1<sup>-/-</sup>

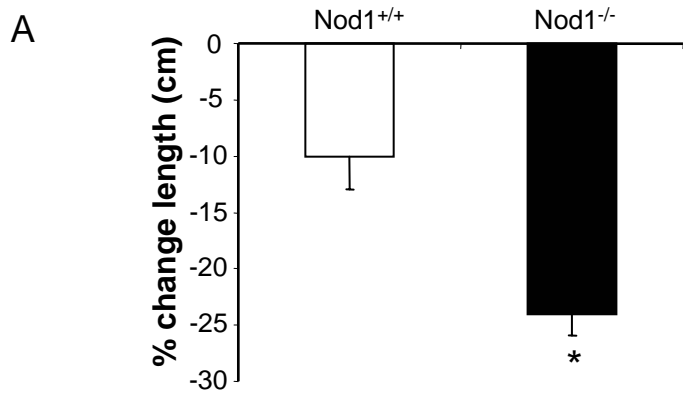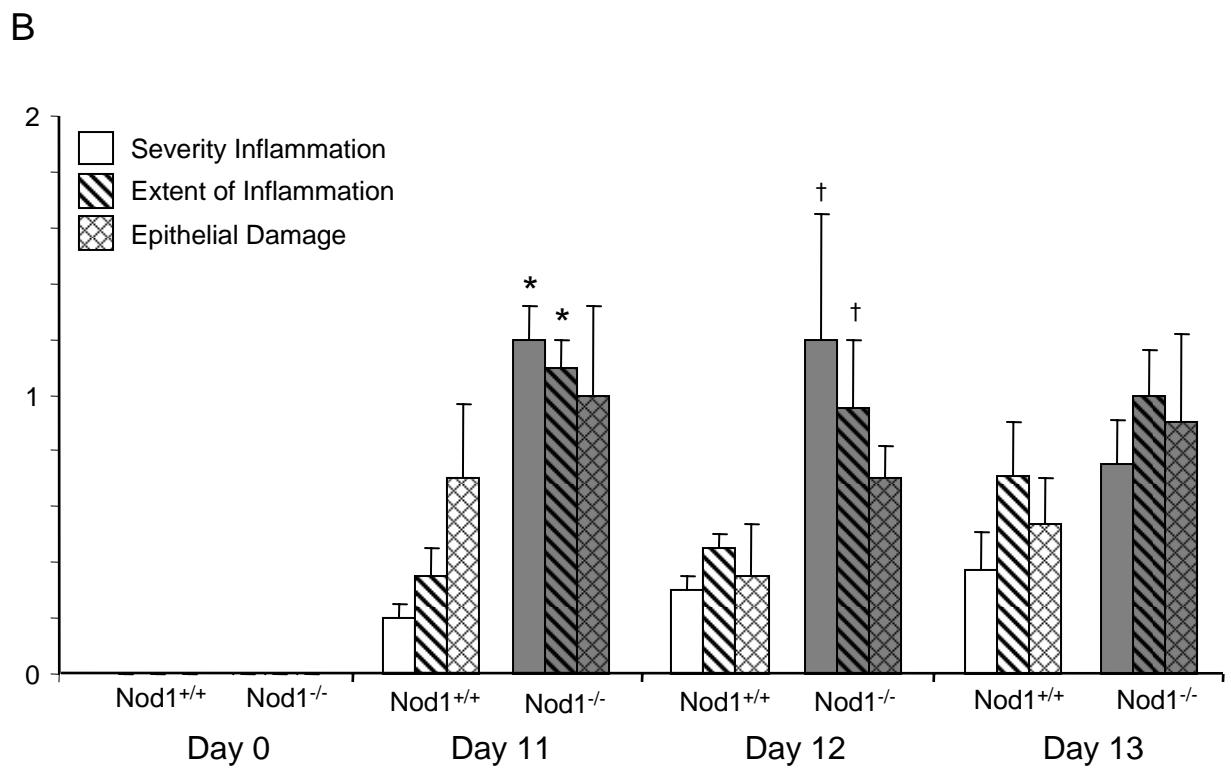

Supplementary Figure 2

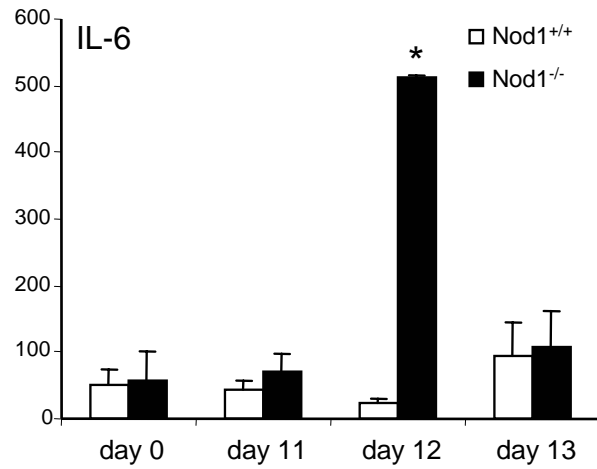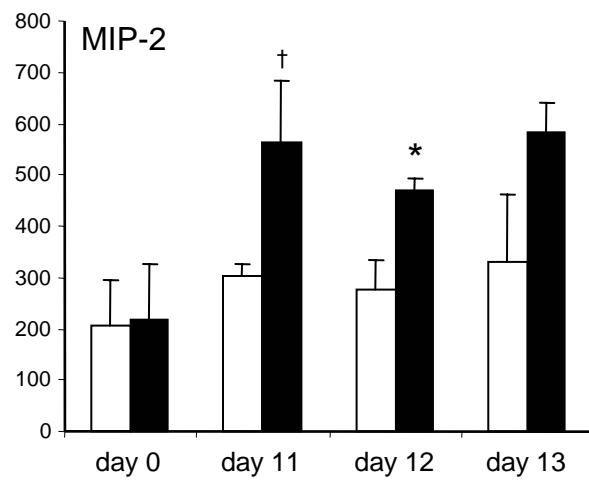

Supplementary Figure 3

**Supplementary Figure 1.** Representative images of adenomas that develop after treatment with AOM and 3 cycles of DSS in *Nod1*<sup>-/-</sup> and wildtype mice. Arrows point to adenomatous tumors and single arrowheads denote normal colonic mucosa. Images are at 40X.

**Supplementary Figure 2.** (A) *Nod1*-deficient mice have greater shortening of colon length after DSS treatment. Colon length was measured from the anus to the cecum in age and sex-matched AOM/DSS-treated and untreated mice on day 12 and compared with age- and sex-matched untreated mice to determine change in colonic length (N=5 per group). (B) Histologic scoring of individual inflammatory parameters used to obtain overall score in Figure 3. Statistical analyses were performed using two-tailed Student's t-test. Error bars, +/- S.E.M., \* p<0.05; †p=0.05.

**Supplementary Figure 3.** Increased cytokine production in DSS-treated *Nod1*-deficient organ cultures. 50-100 mg of colon tissue was harvested and cultured over 24 hours in serum-free RPMI media containing antibiotics. IL-6 and MIP-2 was quantified by ELISA and normalized by amount of colon tissue cultured in milligrams (N=5 per group per timepoint). Statistical analyses were performed using two-tailed Student's t-test. Error bars, +/- S.E.M., \* p<0.05; †p=0.07.
